# White Matter Microstructure Alterations in Early Psychosis and Schizophrenia

Tommaso Pavan<sup>1</sup>, Yasser Alemán-Gómez<sup>1</sup>, Raoul Jenni<sup>2</sup>, Pascal Steullet<sup>2</sup>, Zoé Schilliger<sup>2,6</sup>, Daniella Dwir<sup>2</sup>, Martine Cleusix<sup>2</sup>, Luis Alameda<sup>3,4,5</sup>, Kim Q. Do<sup>2</sup>, Philippe Conus<sup>3</sup>, Paul Klauser<sup>2,6</sup>, Patric Hagmann<sup>1</sup> and Ileana Jelescu<sup>1</sup>

1. Department of Radiology, Lausanne University Hospital (CHUV) and University of Lausanne (UNIL)
2. Center for Psychiatric Neuroscience, Department of Psychiatry, Lausanne University Hospital and the University of Lausanne, Lausanne Switzerland
3. Service of General Psychiatry, Treatment and Early Intervention in Psychosis Program. Lausanne University Hospital (CHUV), Lausanne, Switzerland
4. Department of Psychosis Studies, Institute of Psychiatry, Psychology and Neuroscience. King's College of London, London, UK.
5. Centro Investigacion Biomedica en Red de Salud Mental (CIBERSAM); Instituto de Biomedicina de Sevilla (IBIS), Hospital Universitario Virgen del Rocio, Departamento de Psiquiatria, Universidad de Sevilla, Sevilla, Spain.
6. Service of Child and Adolescent Psychiatry, Department of Psychiatry, Lausanne University Hospital and the University of Lausanne, Lausanne, Switzerland

Corresponding author: Tommaso Pavan; address: *Centre de Recherche en Radiologie*, PET3, CHUV, Rue du Bugnon 46, 1011, Lausanne, Switzerland ; telephone:+41213146020; fax:+41213146020; email: tommaso.pavan@chuv.ch

21      **Abstract**

22      Studies on schizophrenia feature diffusion magnetic resonance imaging (dMRI) to investigate white matter (WM)  
23      anomalies. The heterogeneity in the possible interpretations of typical Diffusion Tensor Imaging (DTI) metrics  
24      highlights the importance of increasing their specificity. Here, we characterize WM pathology in early psychosis (EP)  
25      and schizophrenia (SZ) with increased specificity using advanced dMRI: Diffusion Kurtosis Imaging and the  
26      biophysical model White Matter Tract Integrity – Watson (WMTI-W). This enables us to better characterize WM  
27      abnormalities and relate them to the patient’s clinical characteristics and symptomatology. dMRI-derived  
28      microstructure features were extracted from all of WM and from individual tracts in 275 individuals. 93 subjects  
29      diagnosed with EP and 47 with SZ were compared respectively to 135 age-range matched healthy controls (HC). The  
30      relationships between the microstructure in WM and age at onset, aging trajectories, duration of illness, medication  
31      and various clinical scales were investigated in each patient group. WM diffusivities were higher, while kurtosis was  
32      lower in EP vs HC and in SZ vs HC. Differences were more pronounced in EP than SZ. WMTI-W model parameters  
33      suggest alterations to the extra-axonal compartment in EP and SZ as compared to HC. dMRI patterns in EP and SZ  
34      highly suggest WM deterioration in comparison to HC. The microstructure metrics involved point towards extra-  
35      axonal alterations, consistent with abnormal myelin integrity and WM deterioration. The direct link to  
36      symptomatology is however limited.

37

## 38 Introduction

39 Psychosis is a psychiatric disorder with heavy implications for the affected individuals, their families, and society<sup>1</sup>.  
40 However, the disorder etiology remains only partially understood and considered multifactorial, involving a complex  
41 interplay of genetic, environmental, and neurobiological factors<sup>2,3</sup>. Many clinical studies investigating the psychosis  
42 spectrum<sup>4-9</sup> reported pathological white matter (WM) as a common feature of the disease. Most in vivo studies of  
43 WM abnormalities in psychosis use diffusion magnetic resonance imaging (dMRI), an MRI technique that relies on  
44 the random motion of water molecules to explore the cellular environment and thus infer the microstructural  
45 properties of the underlying biological tissue<sup>10</sup>. The most popular dMRI technique in clinical research is Diffusion  
46 Tensor Imaging (DTI) and its derived scalar metrics: fractional anisotropy (FA), mean/axial/radial diffusivities  
47 (MD/AD/RD). DTI is a so-called *signal representation*<sup>11</sup>, which means it makes no assumption about the underlying  
48 tissue and reports on the apparent diffusivity in the voxel, in any given direction of space<sup>12</sup>.

49 In schizophrenia (SZ) and early psychosis (EP), the most frequently reported and accepted dMRI patterns are reduced  
50 FA and increased MD<sup>5,8,13-19</sup>, consistent with a loss of WM integrity and reduced diffusion barriers. Changes are  
51 widespread across the WM, with limited spatial consistency between studies<sup>4,8,13,20</sup>. Such heterogeneity may arise not  
52 only from cross-cohort heterogeneity<sup>20</sup> but also from different pathological processes affecting the WM, with some  
53 tracts showing non-degenerating early maturational shifts, or displaying accelerated aging<sup>4</sup>. Postmortem studies  
54 further substantiate the WM involvement found in first-episode psychosis participants<sup>3</sup> and in SZ, reporting splitting  
55 and decompacting of myelin sheaths together with dystrophic oligodendroglia<sup>21-24</sup> and microglia<sup>25</sup>.

56 The heterogeneity in the possible DTI interpretations highlights the importance of improving the dMRI-derived  
57 microstructure characterization. A first step is to estimate the tissue diffusion properties more thoroughly, e.g. using  
58 Diffusion Kurtosis Imaging<sup>26,27</sup> (DKI), an extension of DTI that is estimated from stronger diffusion-weighting. DKI  
59 provides complementary information about tissue heterogeneity by going beyond the Gaussian DTI approximation  
60 and quantifying the variance of diffusivities across the voxel, arising from sub-domains such as cellular  
61 compartments. DKI has been able to detect widespread WM abnormality<sup>28</sup> in regions with complex fiber  
62 arrangement<sup>29</sup>, subtle abnormalities in subjects at high risk for psychosis<sup>30</sup> and microstructural connectivity patterns  
63 associated to processing speed deficits in SZ<sup>31</sup>.

64 Nevertheless, DTI and DKI metrics are only *sensitive* to features of the tissue microstructure and their changes can be  
65 the consequence of several possible pathological mechanisms (**Table 1**). To gain specificity, WM *biophysical models*  
66 of diffusion are used<sup>11</sup>, that capture the diffusion behavior in the underlying tissue with a mathematical model based  
67 on *a-priori* knowledge of the tissue structure. WM biophysical models often divide the voxel into two or more  
68 compartments, representing water inside and outside the axons, and sometimes the cerebrospinal fluid (CSF)<sup>11,32</sup>.  
69 Models previously used to characterize EP and SZ are free-water imaging<sup>33</sup> (FWI) and Neurite Orientation Dispersion  
70 and Density Imaging<sup>34</sup> (NODDI). Most FWI studies reported a global increase in free-water in SZ<sup>35</sup> and across  
71 lifespan<sup>36</sup>. NODDI detected decreased neurite density and increased orientation dispersion index in first-episode<sup>37,38</sup>  
72 and SZ<sup>39</sup>. However, both models display limitations in terms of *ad hoc* simplifying assumptions and fit constraints  
73 (e.g. in NODDI, all three compartment diffusivities are fixed<sup>34,40</sup>), strongly limiting the interpretability and validity<sup>40</sup>  
74 of the microstructure parameters estimated from the data<sup>11,41</sup>.

75 In this work we use a more comprehensive biophysical model that overcomes these limitations. White Matter Tract  
76 Integrity-Watson<sup>42,43</sup> (WMTI-W, **Fig. 1**) enables the estimation of intra- and extra-axonal specific diffusivities that are  
77 excellent proxies for intra-axonal injury, inflammation and abnormal myelin integrity respectively<sup>11,43,44</sup>, in addition  
78 to axonal density and orientation dispersion. WMTI and WMTI-W have been recently used to characterize WM  
79 pathology in a variety of pathological mechanisms (**Table 1**), patient populations<sup>45</sup> and animal models of disease<sup>46,47</sup>,  
80 ranging from Alzheimer's disease<sup>48-50</sup> to traumatic brain injury<sup>51</sup>, but, to our knowledge, never in schizophrenia.

81 Using WMTI-W, we aim to characterize for the first time WM pathology in EP and SZ with increased specificity, thus  
82 overcoming the inconsistencies previously found in EP and SZ literature and relate WM pathology to commonly used  
83 clinical measures and characteristics, such as age of psychosis onset, illness duration, medication, and  
84 symptomatology. In light of previous post-mortem ultrastructural findings of myelinated fiber pathology (myelin  
85 sheath splitting with inclusions of vacuoles, small-axons atrophy, dystrophic oligodendroglia<sup>21-24</sup>), we hypothesize  
86 that our dMRI findings will be mainly reflected as increased diffusivity of the extra-axonal space and as reduced  
87 axonal density.

88

## 89 Methods

### 90 Participants

91 The study was approved by the local Ethics Committee of the Canton of Vaud (CER-VD, Switzerland). Data were  
92 collected from 135 healthy controls (HC), 93 subjects with EP and 47 with SZ (**Table 2**). Participants with a diagnosis  
93 of EP (within 5 years after a first psychotic episode as defined by the CAARMS<sup>52</sup>) or SZ (DSM-IV diagnosis of

94 schizophrenia or schizoaffective disorder) were recruited from the Lausanne University Hospital. Exclusion criteria  
95 were psychosis related to intoxication, organic brain disease, IQ<70, alcoholism, drug abuse, major somatic disease,  
96 or current organic brain damage. Duration of illness, age at psychosis onset and medication were registered. HC were  
97 recruited from the same sociodemographic area of the clinical groups and were excluded if they had a first-degree  
98 family member who suffered from psychosis or prodromal symptoms, or if they reported current or past  
99 antipsychotic treatment. The HC group was further subdivided into younger (HC-Y, n=130, age=26.8±6.8) and older  
100 (HC-O, n=84, age=31.9±8.1) to better match the age ranges of the two clinical groups (EP=24.7±5.5; SZ=38.1±9.4  
101 years). Within-group individual diagnoses are reported in **Supplementary Table S1**.

### 102 **MRI acquisition**

104 MRI data were acquired on two different 3-Tesla systems (Magnetom TrioTim and PRISMA, Siemens Healthineers,  
105 Erlangen, Germany), each equipped with a 32-channel head coil. A 1-mm isotropic T1-weighted image was acquired  
106 for anatomical reference. Whole-brain diffusion-weighted images (DWI) were acquired using diffusion spectrum  
107 imaging (DSI) scheme across 15 b-values, ranging from 0 to 8000 s/mm<sup>2</sup>, voxel size of 2.2 x 2.2 x 3 mm<sup>3</sup>. Further  
108 information can be found in the 'Acquisition details' section of the Supplementary Material.

### 109 **Image preprocessing**

110 The T1-weighted images were bias field corrected<sup>53</sup> and skull-stripped via nonlinear registration to the MNI-152  
111 template using Advanced Normalization Tools<sup>54</sup> (ANTs). The diffusion preprocessing pipeline included MP-PCA  
112 denoising, Gibbs ringing-, EPI-, eddy current and motion corrections, following most recent guidelines<sup>55</sup> - see  
113 Supplementary Material for preprocessing details.

### 114 **Microstructure estimation**

116 For DKI and WMTI-W estimation, the diffusion dataset was truncated at  $b \leq 2500$  s/mm<sup>2</sup> (Jensen et al., 2005). DKI was  
117 fit voxel-wise<sup>56</sup> using Matlab, from which seven parameter maps were derived. Four from DTI: RD, MD, AD and FA,  
118 and three from DKI: radial, mean, axial kurtosis (RK, MK, AK). Then, WMTI-W model parameters were estimated  
119 voxel-wise from the DTI and DKI parameters, using an in-house Python script, yielding other five parameter maps:  
120 axonal density  $f$ , intra-axonal diffusivity  $D_a$ , extra-axonal parallel and perpendicular diffusivities  $D_{e,||}$ ,  $D_{e,\perp}$  and axon  
121 orientation alignment  $c_2$  (**Fig. 1**). The WM characterization thus relied on 12 microstructure metrics.

### 122 **ROI analysis**

124 Individual FA maps were non-linearly registered to the Johns Hopkins University FA template<sup>57</sup> (JHU) using ANTs,  
125 and the WM region-of-interest (ROI) atlas labels were mapped back to individual space. WM ROI definition using the  
126 atlas approach was preferred to subject-specific tractography-based reconstruction because it allows easier and  
127 more direct comparison with the large body of literature also using the JHU WM atlas. The mean value of each  
128 microstructure metric was computed for each ROI, as well as in the whole-WM mask defined as the collection of all  
129 JHU ROIs (from here on referred to as 'WM core').

### 130 **Psychiatric scales**

132 Psychiatric tests included the Global Assessment of Functioning<sup>58</sup> scale (GAF), the Positive and Negative Syndrome  
133 Scale<sup>59</sup> (PANSS), and the Montgomery-Asberg Depression Rating Scale<sup>60</sup> (MADRS). For the PANSS, items were  
134 categorized using the Wallwork/Fortgang five-factor model<sup>61</sup>. PANSS data was not available for 5 EP and 1 SZ subjects,  
135 MADRS was not assessed in 6 EP and 16 SZ subjects.

### 136 **Statistical analysis**

138 Before any statistical analysis, all the microstructure parameter estimates in the WM core and individual JHU ROIs  
139 were harmonized for scanner type via ComBat harmonization<sup>62</sup> that was proven efficient at correcting scanner effects  
140 in the same cohort<sup>63</sup>. Distributions for each metric, ROI and group were tested for normality using the Shapiro-Wilk  
141 test and for homogeneity of variance using the Levene's Test. The statistical test used for group comparisons was  
142 chosen based on distribution characteristics, resulting in microstructure metrics for the WM core being tested via  
143 non-parametric *Wilcoxon* signed-rank test, suitable for non-normal but homogeneous variance distributions. At the  
144 ROI level, microstructure metrics between groups were compared using the non-parametric *Brunner-Munzel*<sup>64,65</sup> test,  
145 suitable for distributions with unequal variances. In all comparisons, the estimates were controlled for sex and  
146 quadratic age (the model selection procedure for the age correction is detailed in the Supplementary Material). False-  
147 Discovery Rate (FDR) correction was applied to control for false positives. In total, 24 tests (12 metrics x 2 group  
148 pairs) were conducted for group differences between metrics in the WM core, and 1200 tests for ROI-specific group

149 differences (12 metrics  $\times$  50 JHU ROIs  $\times$  2 group pairs). Effect sizes ( $r$ ) for each comparison were estimated according  
150 to the type of test (*Wilcoxon*:  $r_w$ , *Brunner-Munzel*:  $r_{bm}$ ), see Supplementary Materials for details. The dice coefficient  
151 was used to quantify the similarity in ROI alterations across the brain, indicating the proportion (between 0 and 1)  
152 of significant alterations that EP and SZ groups have in common.  
153 Associations of the microstructure with clinical characteristics: slope contrasts between the various metrics in the  
154 WM core and age at first psychosis, duration of illness, and chlorpromazine-equivalent dose (CPZ-equivalent) were  
155 estimated in R<sup>66</sup>. Each regression was corrected for quadratic age and sex, and p-values were FDR corrected. Between-  
156 group differences in aging trajectories for the microstructure metrics were estimated in a similar manner, but this  
157 time pooling HC vs clinical participants (EP + SZ) and correcting only for sex and FDR.  
158 Associations of the microstructure metrics with psychiatric scales: participants with a delay between clinical  
159 assessment and MRI scan larger than 45 days were excluded from this analysis to ensure good temporal  
160 correspondence between psychiatric status and brain microstructure. The exclusion left 58 EP (mean delay .43 $\pm$ .6  
161 months) and 33 SZ (.58 $\pm$ .42 months) available for the analysis. The correlation matrices between WM core metrics  
162 and psychiatric scales for EP and SZ were analyzed via hierarchical clustering in R<sup>66</sup> with the objective of clustering  
163 similar relationships between symptoms and WM microstructure. Correlation p-values were FDR-corrected (12  
164 metrics  $\times$  8 dimensions  $\times$  2 groups = 192 tests).  
165

## 166 Results

### 167 Demographics

168 **Table 2** collects cohort demographics. Age was significantly different between clinical participants and controls (i.e.,  
169 EP vs HC-Y,  $p=0.03$ ) and SZ vs HC-O,  $p<.0001$ ). Illness duration was longer in SZ than in EP group ( $p<.0001$ ).  
170  
171

### 172 Microstructure imaging estimates in the white matter cores

173 Study templates for DTI, DKI and WMTI-W metrics are plotted in **Fig. S2**. The harmonized mean estimates of the WM  
174 core for the four groups are reported in **Table S2**. In the WM core, several group differences were found (**Fig. 2**).  
175 Compared to HC-Y, EP showed significantly higher DTI diffusivities and lower FA (**Fig. 2A-D**; RD, MD, FA:  $p<.0001$ , AD:  
176  $p=.014$ ), as well as lower kurtosis (**Fig. 2E-G**; RK:  $p=.0017$ , MK:  $p=.0029$ ; AK:  $p=.035$ ). Axonal water fraction,  $f$ , and  
177 alignment,  $c_2$ , in EP were also significantly lower than in HC-Y (**Fig. 2H, L**;  $f$ :  $p=.0053$   $c_2$ :  $p=.0010$ ), while extra-axonal  
178 diffusivities,  $D_{e||}$  and  $D_{e\perp}$ , were higher (**Fig. 2J, K**;  $D_{e||}$ :  $p=.0010$ ,  $D_{e\perp}$ :  $p<.0001$ ). No significant differences were found  
179 between EP and HC-Y in terms of intra-axonal diffusivity  $D_a$  (**Fig. 2I**). Effect sizes were low to medium with the highest  
180 being RD ( $r_w=.32$ ), followed by MD ( $r_w=.31$ ),  $D_{e\perp}$  ( $r_w=.30$ ), and FA ( $r_w=.29$ ).  
181 Differences between SZ and HC-O were more limited, with no significant DTI metric. Kurtosis, however, was lower in  
182 SZ (**Fig. 2E-G**; RK:  $p=.035$ , MK:  $p=.020$ , AK:  $p=.035$ ) with a small effect size (average  $r_w=.20$ ). The WMTI-W model  
183 revealed reduced  $f$  (**Fig. 2H**;  $p=.035$ ), increased  $D_a$  (**Fig. 2I**;  $p=.017$ ), and  $D_{e||}$  (**Fig. 2J**,  $p=.035$ ).  $D_{e||}$  and  $D_a$  showed the  
184 largest effect size ( $r_w=.24$  and  $.23$ ). A complete list of p-values, effect sizes and confidence intervals are found in **Table**  
185 **S3**. We found no significant differences between EP and SZ (**Table S4**).  
186

### 187 Microstructure imaging estimates of the white matter tracts

188 Group comparison of the JHU ROIs revealed distinct patterns in the microstructure metrics tendencies, highlighting  
189 ROI specific alterations in both EP and SZ (**Fig. 3**). Bundles showing the strongest group differences included the  
190 corpus callosum (CC), fornix (FX), corona radiata (CR), posterior thalamic radiation (PTR), sagittal stratum (SAGSTR),  
191 cingulum (CING/CG) and superior longitudinal fasciculus (SLF). Common features were higher DTI diffusivities in  
192 both EP and SZ with respect to their HC groups, with the EP group having the most distinct and widespread increase  
193 across the WM. The percentages of WM ROIs with higher RD, MD, and AD were: 56, 54, 18% in EP and 12, 16, 8% in  
194 SZ. These differences were generally paired to lower FA of the same ROIs in EP, but not as consistently in SZ (34 vs  
195 4%).  
196 Kurtosis metrics were lower in both patient groups. In EP, the significantly lower DKI metrics were matched to the  
197 increase in DTI metrics except for the bilateral cerebellar peduncle (CP) and CING (hippocampal section acc. JHU)  
198 areas. Decreased kurtosis was significant for RK, MK and AK in 24%, 34% and 20% of ROIs, respectively. In SZ, this  
199 trend was notably less consistent (RK: 20%, MK: 24%, AK: 12% of ROIs), with some ROIs showing alterations  
200 detected by DKI and not DTI, such as the bilateral SAGSTR, the left anterior limb of internal capsule (ALIC) and FX  
201 and vice versa, e.g. in CING and right anterior corona radiata (ACR).  
202 WMTI-W metrics displayed the same trends as for the whole WM analysis, with  $f$  lower in several locations of the WM  
203 in SZ and especially EP (10% vs 18% of ROIs), and higher extra-axonal diffusivities. In EP,  $D_{e||}$  and  $D_{e\perp}$  were  
204 significantly altered in 24 and 20% of the ROIs respectively. In the SZ group,  $D_{e||}$  and  $D_{e\perp}$  showed fewer number of

205 significant alterations, 16% and 6%. Notably,  $D_a$  alterations were uncommon in both groups and not spatially  
206 consistent. Finally, sparse  $c_2$  alterations were found in EP (6% of ROIs) but none in SZ.  
207 Overall, the Dice coefficient between EP and SZ differences to their respective HC revealed 36% of EP and SZ ROI  
208 alterations to be common to both groups. The effects sizes for both groups compared to their HC were on average  
209 medium (mean EP  $r_{bm}=.48$ , SZ  $r_{bm}=.50$ ), with highest effect size found in the FA of the left CP in EP ( $r_{bm}=.68$ ) and the  
210 AK of the left SCR in SZ ( $r_{bm}=.75$ ). Kurtosis metrics and FA showed the strongest effect sizes on average across the  
211 metrics and ROIs ( $r_{bm}\approx.55$ ).  $f$  showed the highest average effect size among the WMTI-W metrics ( $r_{bm}=.54$ ). For  
212 additional details about FDR p-values, effect sizes and confidence intervals see **Table S5** and **Table S6**.

### 213 **Association between microstructure estimates and clinical characteristics**

215 We correlated the clinical characteristics to the WM core microstructure (i.e., averaged measure across all WM tracts)  
216 because the microstructure metrics showed widespread consistent changes across JHU ROIs in patients.  
217 Furthermore, this approach limits considerably the number of statistical tests. There were no significant associations  
218 between WM microstructure and age at psychosis onset (**Fig. S3**), nor with illness duration (**Fig. S4**). The intra-axonal  
219 diffusivity,  $D_a$ , showed significant negative association with CPZ-equivalent dose in the SZ group ( $p=.013$ ), which was  
220 significantly different from EP ( $p=.0019$ , **Fig. S5I**). Notably,  $D_{e,||}$ , showed similar yet non-significant trends to  $D_a$ .  
221 Finally, to better understand the aging trajectories of WM microstructure in patients vs. HC we examined the  
222 interaction between age and the two grouping variables (EP+SZ) and HC. No significant differences were found after  
223 FDR correction (12 tests). Individual age trajectories for each dMRI metric can be found in **Fig. S6**.

224

### 225 **Association between microstructure estimates and psychopathological symptom domains**

226 We examined associations between microstructure metrics in the WM core and symptom scores. Differences in  
227 psychiatric scales between EP and SZ, and the average delay between psychiatric evaluation and MRI scan for the  
228 whole cohort are reported in **Table 2**.

229 Overall, correlations between psychiatric scales and WM microstructure metrics were stronger in SZ than EP (**Fig.**  
230 **4B vs A**). However, no correlation survived FDR correction (192 tests). In EP, hierarchical clustering identified two  
231 macro clusters of microstructure metrics (**Fig. 4A** top dendrograms, clustering of columns): i) diffusivities cluster  
232 (RD, MD, AD,  $D_{e,||}$ ,  $D_{e,\perp}$ ,  $D_a$ ) and ii) kurtosis and anisotropy cluster (RK, AK, MK,  $f$ , FA,  $c_2$ ), informing about the tissue  
233 complexity. Contrary to the trends of dMRI group differences between EP vs HC-Y (higher diffusivities and lower  
234 kurtosis in the patient vs HC group), GAF score correlated positively with the diffusivities cluster (i) and negatively  
235 with the kurtosis cluster (ii). Thus, higher functioning corresponded to faster diffusivities and to lower FA, kurtosis  
236 and  $f$ . Scores for all the psychiatric dimensions also revealed decreased diffusivities and increased kurtosis with  
237 worsening of the symptoms (**Fig. 4A**).

238 In SZ, similar clusters were found for i) diffusivities (RD, MD, AD,  $D_{e,||}$ ,  $D_{e,\perp}$ ), however  $D_a$  was clustered with the ii)  
239 kurtosis and anisotropy cluster (RK, AK, MK,  $f$ , FA,  $c_2$ ,  $D_a$ , **Fig. 4B**, vertical clustering). The clustering of the symptom  
240 dimensions differed from EP. The GAF showed positive correlation with the kurtosis and anisotropy metrics cluster  
241 (ii), while negative correlation with the diffusivities cluster (i), consistent with trends in dMRI group differences of  
242 elevated diffusivities and reduced kurtosis in SZ vs HC-O. Similarly, PANSS exc. scores correlated with increased  
243 diffusivities (i), and decreased complexity (ii, **Fig. 4B**, first horizontal cluster), although these effects should be  
244 treated with caution, given the low scores and the absence of acute manic states in the cohort. Finally, a second cluster  
245 comprising the rest of the PANSS scales and the MADRS mainly showed consistent negative correlations with  $D_a$  and  
246  $c_2$ . Although we underline that none of these associations was significant after FDR, the consistency of positive and  
247 negative associations across the scores and cluster blocks suggests they may not be random.

## 248 **Discussion**

249 With the present analysis we employed more advanced diffusion metrics than DTI, namely DKI and a comprehensive  
250 microstructure model, WMTI-W, both aimed at characterizing the WM pathology with increased sensitivity and  
251 specificity in EP and SZ cohorts.

252 Our findings reveal that WM alterations are already present and widespread in the EP stage and differences in  
253 microstructure are in fact less pronounced between chronic SZ and HC-O when accounting for age. Such results  
254 support the developmental interpretation of schizophrenia according to which systematic FA differences to HC  
255 originate during adolescence and remain through the lifespan<sup>67-70</sup>. In this context, the widespread alterations found  
256 in EP could result from a shift in peaks in the WM development, achieved earlier in patients<sup>4,69</sup> than HC. In other  
257 words, for a similar age, WM in EP could already have peaked and be on the decline while the HC-Y is still maturing.  
258 Consequently, the less widespread differences in SZ vs HC-O could be attributed to the WM maturational shift rather  
259 than accelerated aging<sup>69</sup> for which stronger and more widespread alterations are expected. However, the less

260 pronounced alterations in SZ can also be explained by the SZ cohort size with respect to the wide age range, which  
 261 could cause the underestimation of the alterations from a statistical perspective. Supporting this last conclusion are  
 262 the age-trajectories of our cohort that did not significantly differ between EP and SZ participants when compared to  
 263 HC, while differences in age trajectories between the two stages of the disease are often reported<sup>4,69,71</sup>.  
 264 In accordance with our hypothesis, most EP and SZ WM differences to HC concerned the radial direction of diffusion,  
 265 i.e., perpendicularly to the bundle main axis. Thus, RD and MD were the most affected, while AD differences were less  
 266 significant. Our study confirms previous DTI<sup>4,17,67</sup>, dMRI microstructure<sup>63,72</sup> and post-mortem cytoarchitectural<sup>3</sup>  
 267 alterations found already at the EP stage, and the widespread reduced FA and increased MD<sup>4-6,13-15,17,19,38,67,73</sup>, RD and  
 268 AD<sup>6,16,74,75</sup> in areas commonly reported in both EP and chronic SZ.  
 269 In addition, WM kurtosis was lower for both patient groups, but also more pronounced in EP, and more particularly  
 270 in the radial direction with a moderate effect size, representing a decrease in tissue complexity and  
 271 heterogeneity<sup>26,27,44</sup>. Remarkably, in SZ vs HC-O, DKI was able to identify differences in WM ROIs (SAGSTR, left ALIC  
 272 and FX) that were not evident in DTI. In a review from Pasternak et al.<sup>76</sup>, all studies but one also reported reduced  
 273 MK, with one study also reporting lower RK and AK in SZ<sup>29</sup>.  
 274 Our ROI-specific differences in microstructure metrics between EP or SZ participants and controls were consistent  
 275 with literature, as previous studies also reported alterations in CING<sup>4</sup>, FX<sup>77,78</sup>, CR<sup>79-81</sup>, PTR<sup>81,82</sup> and SAGSTR<sup>82</sup> in EP,  
 276 that remained present in SZ. CC and SLF<sup>4,15</sup> are considered to have a declining trajectory with aging in SZ<sup>4,15</sup> (either  
 277 FA decrease or MD increase when compared to HC), but our results confirm only the SLF trajectory (increased MD,  
 278 decreased FA in EP and decreased kurtosis in SZ), while the CC was not altered as much in SZ as in EP<sup>4,77-82</sup>.  
 279 For the first time, we used WMTI-W, a comprehensive biophysical model of WM, to tease apart possible pathological  
 280 contributions to the reported WM differences. In EP, WMTI-W helps attribute the observed alterations to the extra-  
 281 axonal compartment, due to the significant increase in  $D_{e,||}$  and  $D_{e,\perp}$ , but not  $D_a$ . The lower axonal water fraction  $f$  and  
 282 orientation coherence  $c_2$  are further consistent with pathological features such as altered myelination and axonal  
 283 density. The former have indeed been shown to induce an increase in  $D_{e,\perp}$  and decrease in  $f$ <sup>46,47</sup> (**Table 1**) while the  
 284 increase in  $D_{e,||}$  can be a consequence of overall reduced cellular density and thereby hindrance in the extra-axonal  
 285 space. The SZ group was overall characterized by higher  $D_{e,||}$  and lower  $f$ , also pointing to less densely packed extra-  
 286 cellular space. The WM core analysis suggested also higher intra-axonal diffusivity  $D_a$  in this group, but only two  
 287 specific ROIs sustained this trend (CING and CC). Previous works using NODDI<sup>34</sup>, a comparable but more constrained  
 288 biophysical model, also reported reduced neurite density (comparable to  $f$ ) in several ROIs and increased orientation  
 289 dispersion index (corresponding to lower  $c_2$ ) in both first episode and chronic SZ<sup>72</sup>. These patterns of preferentially  
 290 altered extra-axonal environment are also consistent with reports of global increase in "free water" using the FWI  
 291 technique in SZ cohorts<sup>35</sup>, although FWI conflates potential pathological mechanisms by defining a tissue  
 292 compartment (intra- and extra-axonal) vs a free water (CSF) one.  
 293 The pathological WM changes suggested by WMTI-W are indeed supported by neuroimaging findings beyond dMRI,  
 294 such as a 14% reduction in WM volume<sup>83</sup>, and ultrastructural post-mortem studies reporting myelinated WM fiber  
 295 pathology, such as decompacting and splitting of the myelin sheath, inclusions of vacuoles in-between myelin layers,  
 296 small-axons atrophy, and the presence of swollen or dystrophic oligodendroglia<sup>22-24</sup> and microglia<sup>25</sup>. In parallel to  
 297 these morphological changes, a 27-28% reduction in oligodendrocyte densities were reported in cortical layer III and  
 298 subcortical areas<sup>21</sup> of SZ specimens.  
 299 The lack of significant associations of WM microstructure metrics with age at first psychosis, medication or with the  
 300 duration of illness is aligned with the literature<sup>84</sup>. The correlations between WM microstructure and symptoms were  
 301 also weak and non-significant, despite in accordance with previous studies<sup>8</sup>. Speculatively, this scenario could be  
 302 caused by competing pathological mechanisms between deterioration<sup>4</sup>-abnormal myelination<sup>46</sup> vs  
 303 neuroinflammation<sup>44</sup> (demyelination vs microgliosis-astrogliosis in **Table 1**) that have opposite effects on  
 304 microstructure metrics and, when combined, result in a challenging interpretation. Indeed, neuroinflammation has  
 305 the effect of reducing diffusivities and increasing kurtosis due to higher cellular crowding associated with  
 306 microgliosis and astrocytosis<sup>44,46,47,85</sup>. In support of this mechanism, proinflammatory cytokines have been reported  
 307 to be elevated in EP<sup>86</sup> and SZ<sup>87</sup>, and were related to negative symptoms in EP<sup>86</sup>. Furthermore, this interpretation  
 308 would explain the unconvincing/absence of associations between symptoms and microstructure metrics often  
 309 reported<sup>8</sup>.  
 310 Supported by previous postmortem ultrastructural findings, our results point in the direction of pathological  
 311 myelination and we foresee a motivation to use advanced dMRI for tracking disease progression of this aspect of the  
 312 pathology, and possibly distinguish myelin loss from axonal loss<sup>47</sup> or atrophy. However, given the small to medium  
 313 effect sizes found in most of the microstructure metrics (**Table S3, 5, 6**), their applicability may be limited to group  
 314 level studies and not at individual level if not assessed in the context of a reference norm (e.g. normative modelling<sup>88</sup>).  
 315 Several questions also remain open with regards to the evolution of the pathology and how changes to the diffusion  
 316 metrics behave during acute psychosis phases. Going forward, dMRI combined with careful biophysical modeling  
 317 could continue to provide crucial information about cellular-level brain changes in EP and SZ in vivo and  
 318 longitudinally.

319 The first two main limitations of the present study are the use of the age-range approach instead of age-matching and  
320 the use of data from two scanners that is a source of bias, possibly even after careful harmonization. The age-range  
321 approach was preferred to maintain the sample size as large as possible to better correct for the scanner effect and  
322 increase the statistical power of the analyses. In addition, we believe it was preferable not to pair participants by age  
323 at the cost of pairing data from different scanners, which could introduce more bias. With regards to the WM  
324 biophysical model, the modeling of the axonal dispersion as Watson distribution is not ideally suited for multi-fiber  
325 configurations, e.g. crossing fibers<sup>11</sup>. Furthermore, as symptoms are transitory in nature, the patient's symptomatic  
326 state at the time of the MRI scan may differ from the state that led to the assigned clinical score. This mismatch  
327 highlights the challenges of relating brain pathology characterized non-invasively using dMRI to symptomatology and  
328 the necessity to embrace different approaches to face such heterogeneity (e.g. normative modelling<sup>20</sup>). In the light of  
329 the limitations of the present study, the generalizability of our conclusions needs to be confirmed in other cohorts.  
330 In conclusion, with this work we demonstrated that WM alterations, already present at the early psychosis stages,  
331 manifest preferentially perpendicular to the axons as major extra-cellular increase in diffusivities, decreased intra-  
332 cellular water fraction, and loss of fiber alignment, consistent with early myelin aberrations and shifted maturation.  
333 Remarkably, with time, these differences become less dramatic in chronic SZ as compared to age range-matched  
334 controls.  
335

## 336 **Acknowledgments**

337 This work was supported by the Swiss National Science Foundation (PCEFP2\_194260, to I.J.), the National Center of  
338 Competence in Research (NCCR) "SYNAPSY - The Synaptic Bases of Mental Diseases" from the Swiss National Science  
339 Foundation (n° 51NF40 - 185897 to KQD & PC) and the Foundation Alamaya. LA is supported by Carigest fellowship.  
340 PK, DD and LA are supported by the Adrian & Simone Frutiger Foundation .

## 341 **Conflict of Interest**

342 The authors have nothing to disclose and there are no conflicts of interest.

## 343 **References**

- 344 1. Wittchen, H. U. *et al.* The size and burden of mental disorders and other disorders of the brain in Europe 2010.  
345 *Eur. Neuropsychopharmacol. J. Eur. Coll. Neuropsychopharmacol.* **21**, 655–679 (2011).
- 346 2. Keshavan, M. S. *et al.* Neurobiology of early psychosis. *Br. J. Psychiatry* **187**, s8–s18 (2005).
- 347 3. Harrison, P. J. The neuropathology of schizophrenia: A critical review of the data and their interpretation. *Brain*  
348 **122**, 593–624 (1999).
- 349 4. Cetin-Karayumak, S. *et al.* White matter abnormalities across the lifespan of schizophrenia: a harmonized multi-  
350 site diffusion MRI study. *Mol. Psychiatry* **25**, 3208–3219 (2020).
- 351 5. Friedman, Joseph I. *et al.* Diffusion Tensor Imaging Findings in First-Episode and Chronic Schizophrenia  
352 Patients. *Am. J. Psychiatry* **165**, 1024–1032 (2008).
- 353 6. Barth, C. *et al.* In vivo white matter microstructure in adolescents with early-onset psychosis: a multi-site mega-  
354 analysis. *Mol. Psychiatry* **28**, 1159–1169 (2023).
- 355 7. Karlsgodt, K. H. White Matter Microstructure across the Psychosis Spectrum. *Trends Neurosci.* **43**, 406–416  
356 (2020).
- 357 8. Kelly, S. *et al.* Widespread white matter microstructural differences in schizophrenia across 4322 individuals:  
358 results from the ENIGMA Schizophrenia DTI Working Group. *Mol. Psychiatry* **23**, 1261–1269 (2018).



- 359 9. van Velzen, L. S. *et al.* White matter disturbances in major depressive disorder: a coordinated analysis across  
360 20 international cohorts in the ENIGMA MDD working group. *Mol. Psychiatry* **25**, 1511–1525 (2020).
- 361 10. Beaulieu, C. The basis of anisotropic water diffusion in the nervous system - a technical review. *NMR Biomed.*  
362 **15**, 435–455 (2002).
- 363 11. Jelescu, I. O. & Budde, M. D. Design and Validation of Diffusion MRI Models of White Matter. *Front. Phys.* **5**,  
364 (2017).
- 365 12. Le Bihan, D. *et al.* Diffusion tensor imaging: Concepts and applications. *J. Magn. Reson. Imaging* **13**, 534–546  
366 (2001).
- 367 13. Dwork, A. J., Mancevski, B. & Rosoklija, G. White matter and cognitive function in schizophrenia. *Int. J.*  
368 *Neuropsychopharmacol.* **10**, 513 (2007).
- 369 14. Pasternak, O., Westin, C.-F., Dahlben, B., Bouix, S. & Kubicki, M. The extent of diffusion MRI markers of  
370 neuroinflammation and white matter deterioration in chronic schizophrenia. *Schizophr. Res.* **161**, 113–118  
371 (2015).
- 372 15. Waszczuk, K. *et al.* Relationship between White Matter Alterations and Pathophysiological Symptoms in  
373 Patients with Ultra-High Risk of Psychosis, First-Episode, and Chronic Schizophrenia. *Brain Sci.* **12**, 354 (2022).
- 374 16. Klauser, P. *et al.* White Matter Disruptions in Schizophrenia Are Spatially Widespread and Topologically  
375 Converge on Brain Network Hubs. *Schizophr. Bull.* **43**, 425–435 (2017).
- 376 17. Tamnes, C. K. & Agartz, I. White Matter Microstructure in Early-Onset Schizophrenia: A Systematic Review of  
377 Diffusion Tensor Imaging Studies. *J. Am. Acad. Child Adolesc. Psychiatry* **55**, 269–279 (2016).
- 378 18. Kraguljac, N. V. *et al.* Neuroimaging Biomarkers in Schizophrenia. *Am. J. Psychiatry* **178**, 509–521 (2021).
- 379 19. Sagarwala, R. & Nasrallah, H. A. The effect of antipsychotic medications on white matter integrity in first-  
380 episode drug-naïve patients with psychosis: A review of DTI studies. *Asian J. Psychiatry* **61**, 102688 (2021).
- 381 20. Lv, J. *et al.* Individual deviations from normative models of brain structure in a large cross-sectional  
382 schizophrenia cohort. *Mol. Psychiatry* **26**, 3512–3523 (2021).
- 383 21. Hof, P. R. *et al.* Loss and altered spatial distribution of oligodendrocytes in the superior frontal gyrus in  
384 schizophrenia. *Biol. Psychiatry* **53**, 1075–1085 (2003).
- 385 22. Uranova, N. A., Vikhрева, O. V., Rachmanova, V. I. & Orlovskaya, D. D. Ultrastructural Alterations of Myelinated  
386 Fibers and Oligodendrocytes in the Prefrontal Cortex in Schizophrenia: A Postmortem Morphometric Study.  
387 *Schizophr. Res. Treat.* **2011**, e325789 (2011).

- 388 23. Uranova, N. A., Vikhрева, O. V., Rakhmanova, V. I. & Orlovskaya, D. D. Ultrastructural pathology of  
389 oligodendrocytes adjacent to microglia in prefrontal white matter in schizophrenia. *Npj Schizophr.* **4**, 1–10  
390 (2018).
- 391 24. *The Neuropathology of Schizophrenia.* (Springer International Publishing, Cham, 2021). doi:10.1007/978-3-  
392 030-68308-5.
- 393 25. Uranova, N. A., Vikhрева, O. V., Rakhmanova, V. I. & Orlovskaya, D. D. Dystrophy of Oligodendrocytes and  
394 Adjacent Microglia in Prefrontal Gray Matter in Schizophrenia. *Front. Psychiatry* **11**, (2020).
- 395 26. Jensen, J. H., Helpert, J. A., Ramani, A., Lu, H. & Kaczynski, K. Diffusional kurtosis imaging: The quantification of  
396 non-gaussian water diffusion by means of magnetic resonance imaging. *Magn. Reson. Med.* **53**, 1432–1440  
397 (2005).
- 398 27. Jensen, J. H. & Helpert, J. A. MRI quantification of non-Gaussian water diffusion by kurtosis analysis. *NMR*  
399 *Biomed.* **23**, 698–710 (2010).
- 400 28. Narita, H. *et al.* Mean kurtosis alterations of cerebral white matter in patients with schizophrenia revealed by  
401 diffusion kurtosis imaging. *Prog. Neuropsychopharmacol. Biol. Psychiatry* **71**, 169–175 (2016).
- 402 29. Zhu, J. *et al.* Performances of diffusion kurtosis imaging and diffusion tensor imaging in detecting white matter  
403 abnormality in schizophrenia. *NeuroImage Clin.* **7**, 170–176 (2015).
- 404 30. Zhang, F. *et al.* MK-Curve improves sensitivity to identify white matter alterations in clinical high risk for  
405 psychosis. *NeuroImage* **226**, 117564 (2021).
- 406 31. Kochunov, P. *et al.* Diffusion-weighted imaging uncovers likely sources of processing-speed deficits in  
407 schizophrenia. *Proc. Natl. Acad. Sci.* **113**, 13504–13509 (2016).
- 408 32. Novikov, D. S., Fieremans, E., Jespersen, S. N. & Kiselev, V. G. Quantifying brain microstructure with diffusion  
409 MRI: Theory and parameter estimation. *NMR Biomed.* **32**, e3998 (2019).
- 410 33. Pasternak, O., Sochen, N., Gur, Y., Intrator, N. & Assaf, Y. Free water elimination and mapping from diffusion MRI.  
411 *Magn. Reson. Med.* **62**, 717–730 (2009).
- 412 34. Zhang, H., Schneider, T., Wheeler-Kingshott, C. A. & Alexander, D. C. NODDI: practical in vivo neurite orientation  
413 dispersion and density imaging of the human brain. *NeuroImage* **61**, 1000–1016 (2012).
- 414 35. Carreira Figueiredo, I., Borgan, F., Pasternak, O., Turkheimer, F. E. & Howes, O. D. White-matter free-water  
415 diffusion MRI in schizophrenia: a systematic review and meta-analysis. *Neuropsychopharmacology* **47**, 1413–  
416 1420 (2022).

- 417 36. Cetin-Karayumak, S. *et al.* Characterization of the extracellular free water signal in schizophrenia using multi-  
418 site diffusion MRI harmonization. *Mol. Psychiatry* 1–9 (2023) doi:10.1038/s41380-023-02068-1.
- 419 37. Rae, C. L. *et al.* Deficits in Neurite Density Underlie White Matter Structure Abnormalities in First-Episode  
420 Psychosis. *Biol. Psychiatry* **82**, 716–725 (2017).
- 421 38. Kraguljac, N. V. *et al.* White matter integrity, duration of untreated psychosis, and antipsychotic treatment  
422 response in medication-naïve first-episode psychosis patients. *Mol. Psychiatry* **26**, 5347–5356 (2021).
- 423 39. Kraguljac, N. V. *et al.* A longitudinal neurite and free water imaging study in patients with a schizophrenia  
424 spectrum disorder. *Neuropsychopharmacology* **44**, 1932–1939 (2019).
- 425 40. Novikov, D. S., Kiselev, V. G. & Jespersen, S. N. On modeling. *Magn. Reson. Med.* **79**, 3172–3193 (2018).
- 426 41. Jelescu, I. O., Veraart, J., Fieremans, E. & Novikov, D. S. Degeneracy in model parameter estimation for multi-  
427 compartmental diffusion in neuronal tissue. *NMR Biomed.* **29**, 33–47 (2016).
- 428 42. Jespersen, S. N., Olesen, J. L., Hansen, B. & Shemesh, N. Diffusion time dependence of microstructural parameters  
429 in fixed spinal cord. *NeuroImage* **182**, 329–342 (2018).
- 430 43. Fieremans, E., Jensen, J. H. & Helpert, J. A. White matter characterization with diffusional kurtosis imaging.  
431 *NeuroImage* **58**, 177–188 (2011).
- 432 44. Jelescu, I. O. & Fieremans, E. Chapter 2 - Sensitivity and specificity of diffusion MRI to neuroinflammatory  
433 processes. in *Advances in Magnetic Resonance Technology and Applications* (eds. Laule, C. & Port, J. D.) vol. 9 31–  
434 50 (Academic Press, 2023).
- 435 45. Kamiya, K. *et al.* Diffusion imaging of reversible and irreversible microstructural changes within the  
436 corticospinal tract in idiopathic normal pressure hydrocephalus. *NeuroImage Clin.* **14**, 663–671 (2017).
- 437 46. Guglielmetti, C. *et al.* Diffusion kurtosis imaging probes cortical alterations and white matter pathology  
438 following cuprizone induced demyelination and spontaneous remyelination. *NeuroImage* **125**, 363–377  
439 (2016).
- 440 47. Jelescu, I. O. *et al.* In vivo quantification of demyelination and recovery using compartment-specific diffusion  
441 MRI metrics validated by electron microscopy. *NeuroImage* **132**, 104–114 (2016).
- 442 48. Dong, J. W. *et al.* Diffusion MRI biomarkers of white matter microstructure vary nonmonotonically with  
443 increasing cerebral amyloid deposition. *Neurobiol. Aging* **89**, 118–128 (2020).
- 444 49. Tristão Pereira, C. *et al.* Synchronous nonmonotonic changes in functional connectivity and white matter  
445 integrity in a rat model of sporadic Alzheimer’s disease. *NeuroImage* **225**, 117498 (2021).

- 446 50. Pavan, T. *et al.* Microstructure of White Matter, Probed With Diffusion MRI Modeling, Reveals Distinct  
447 Correlations Between Intra- vs Extra-Cellular Spaces and Tau Load. *Alzheimers Dement.* **19**, e078259 (2023).
- 448 51. Chung, S. *et al.* White Matter Tract Integrity: An Indicator of Axonal Pathology after Mild Traumatic Brain Injury.  
449 *J. Neurotrauma* **35**, 1015–1020 (2018).
- 450 52. Yung, A. R. *et al.* Mapping the onset of psychosis: the Comprehensive Assessment of At-Risk Mental States. *Aust.*  
451 *N. Z. J. Psychiatry* **39**, 964–971 (2005).
- 452 53. Tustison, N. J. *et al.* N4ITK: improved N3 bias correction. *IEEE Trans. Med. Imaging* **29**, 1310–1320 (2010).
- 453 54. Avants, B. B., Epstein, C. L., Grossman, M. & Gee, J. C. Symmetric diffeomorphic image registration with cross-  
454 correlation: evaluating automated labeling of elderly and neurodegenerative brain. *Med. Image Anal.* **12**, 26–41  
455 (2008).
- 456 55. Ades-Aron, B. *et al.* Evaluation of the accuracy and precision of the diffusion parameter ESTimation with Gibbs  
457 and Noise removal pipeline. *NeuroImage* **183**, 532–543 (2018).
- 458 56. Veraart, J., Sijbers, J., Sunaert, S., Leemans, A. & Jeurissen, B. Weighted linear least squares estimation of  
459 diffusion MRI parameters: Strengths, limitations, and pitfalls. *NeuroImage* **81**, 335–346 (2013).
- 460 57. Mori, S., Wakana, S., Van Zijl, P. C. & Nagae-Poetscher, L. M. *MRI Atlas of Human White Matter*. (Elsevier, 2005).
- 461 58. American Psychiatric Association. *Diagnostic and Statistical Manual of Mental Disorders (4th Ed., Text Rev.)*.  
462 (2000).
- 463 59. Kay, S. R., Fiszbein, A. & Opler, L. A. The Positive and Negative Syndrome Scale (PANSS) for Schizophrenia.  
464 *Schizophr. Bull.* **13**, 261–276 (1987).
- 465 60. Montgomery, S. A. & Asberg, M. A new depression scale designed to be sensitive to change. *Br. J. Psychiatry J.*  
466 *Ment. Sci.* **134**, 382–389 (1979).
- 467 61. Wallwork, R. S., Fortgang, R., Hashimoto, R., Weinberger, D. R. & Dickinson, D. Searching for a consensus five-  
468 factor model of the Positive and Negative Syndrome Scale for schizophrenia. *Schizophr. Res.* **137**, 246–250  
469 (2012).
- 470 62. Fortin, J.-P. *et al.* Harmonization of multi-site diffusion tensor imaging data. *NeuroImage* **161**, 149–170 (2017).
- 471 63. Alemán-Gómez, Y. *et al.* Partial-volume modeling reveals reduced gray matter in specific thalamic nuclei early  
472 in the time course of psychosis and chronic schizophrenia. *Hum. Brain Mapp.* **41**, 4041–4061 (2020).
- 473 64. Brunner, E. & Munzel, U. The Nonparametric Behrens-Fisher Problem: Asymptotic Theory and a Small-Sample  
474 Approximation. *Biom. J.* **42**, 17–25 (2000).

- 475 65. Karch, J. D. Psychologists Should Use Brunner-Munzel's Instead of Mann-Whitney's U Test as the Default  
476 Nonparametric Procedure. *Adv. Methods Pract. Psychol. Sci.* **4**, 2515245921999602 (2021).
- 477 66. R Core Team. *R: A Language and Environment for Statistical Computing*. (R Foundation for Statistical Computing,  
478 Vienna, Austria, 2023).
- 479 67. Samartzis, L., Dima, D., Fusar-Poli, P. & Kyriakopoulos, M. White Matter Alterations in Early Stages of  
480 Schizophrenia: A Systematic Review of Diffusion Tensor Imaging Studies. *J. Neuroimaging* **24**, 101–110 (2014).
- 481 68. Peters, B. D. & Karlsgodt, K. H. White matter development in the early stages of psychosis. *Schizophr. Res.* **161**,  
482 61–69 (2015).
- 483 69. Kochunov, P. & Hong, L. E. Neurodevelopmental and neurodegenerative models of schizophrenia: white matter  
484 at the center stage. *Schizophr. Bull.* **40**, 721–728 (2014).
- 485 70. Carletti, F. *et al.* Alterations in White Matter Evident Before the Onset of Psychosis. *Schizophr. Bull.* **38**, 1170–  
486 1179 (2012).
- 487 71. Cropley, V. L. *et al.* Accelerated Gray and White Matter Deterioration With Age in Schizophrenia. *Am. J. Psychiatry*  
488 **174**, 286–295 (2017).
- 489 72. Kraguljac, N. V., Guerreri, M., Strickland, M. J. & Zhang, H. Neurite Orientation Dispersion and Density Imaging  
490 in Psychiatric Disorders: A Systematic Literature Review and a Technical Note. *Biol. Psychiatry Glob. Open Sci.*  
491 **3**, 10–21 (2023).
- 492 73. Cheung, V. *et al.* Positive symptoms and white matter microstructure in never-medicated first episode  
493 schizophrenia. *Psychol. Med.* **41**, 1709–1719 (2011).
- 494 74. Kitamura, H. *et al.* Diffusion tensor analysis in chronic schizophrenia A preliminary study on a high-field (3.0T)  
495 system. *Eur. Arch. Psychiatry Clin. Neurosci.* **255**, 313–318 (2005).
- 496 75. Sato, Y. *et al.* Relationship Between White Matter Microstructure and Hallucination Severity in the Early Stages  
497 of Psychosis: A Diffusion Tensor Imaging Study. *Schizophr. Bull. Open* **2**, sgab015 (2021).
- 498 76. Pasternak, O., Kelly, S., Sydnor, V. J. & Shenton, M. E. Advances in microstructural diffusion neuroimaging for  
499 psychiatric disorders. *NeuroImage* **182**, 259–282 (2018).
- 500 77. Abdul-Rahman, M. F., Qiu, A. & Sim, K. Regionally Specific White Matter Disruptions of Fornix and Cingulum in  
501 Schizophrenia. *PLOS ONE* **6**, e18652 (2011).
- 502 78. Luck, D., Malla, A. K., Joobar, R. & Lepage, M. Disrupted integrity of the fornix in first-episode schizophrenia.  
503 *Schizophr. Res.* **119**, 61–64 (2010).

- 504 79. Koshiyama, D. *et al.* Role of frontal white matter and corpus callosum on social function in schizophrenia.  
505 *Schizophr. Res.* **202**, 180–187 (2018).
- 506 80. Chen, S. *et al.* The role of white matter abnormality in the left anterior corona radiata: In relation to formal  
507 thought disorder in patients with schizophrenia. *Psychiatry Res.* **307**, 114302 (2022).
- 508 81. Meng, L. *et al.* Widespread white-matter microstructure integrity reduction in first-episode schizophrenia  
509 patients after acute antipsychotic treatment. *Schizophr. Res.* **204**, 238–244 (2019).
- 510 82. Ochi, R. *et al.* White matter microstructural organizations in patients with severe treatment-resistant  
511 schizophrenia: A diffusion tensor imaging study. *Prog. Neuropsychopharmacol. Biol. Psychiatry* **100**, 109871  
512 (2020).
- 513 83. Elfaki, A. A. *et al.* STEREOLOGICAL EVALUATION OF BRAIN MAGNETIC RESONANCE IMAGES OF  
514 SCHIZOPHRENIC PATIENTS. *Image Anal. Stereol.* **32**, 145–153 (2013).
- 515 84. Kanaan, R. *et al.* White matter microstructure in schizophrenia: effects of disorder, duration and medication. *Br.*  
516 *J. Psychiatry* **194**, 236–242 (2009).
- 517 85. Wijtenburg, S. A. & Rowland, L. M. Chapter 19 - Schizophrenia spectrum disorders. in *Advances in Magnetic*  
518 *Resonance Technology and Applications* (eds. Laule, C. & Port, J. D.) vol. 9 469–487 (Academic Press, 2023).
- 519 86. Dunleavy, C., Elsworth, R. J., Upthegrove, R., Wood, S. J. & Aldred, S. Inflammation in first-episode psychosis:  
520 The contribution of inflammatory biomarkers to the emergence of negative symptoms, a systematic review and  
521 meta-analysis. *Acta Psychiatr. Scand.* **146**, 6–20 (2022).
- 522 87. Goldsmith, D. R., Rapaport, M. H. & Miller, B. J. A meta-analysis of blood cytokine network alterations in  
523 psychiatric patients: comparisons between schizophrenia, bipolar disorder and depression. *Mol. Psychiatry* **21**,  
524 1696–1709 (2016).
- 525 88. Marquand, A. *et al.* Conceptualizing mental disorders as deviations from normative functioning. *Mol. Psychiatry*  
526 **24**, (2019).
- 527 89. Zhuo, J. *et al.* Diffusion kurtosis as an in vivo imaging marker for reactive astrogliosis in traumatic brain injury.  
528 *NeuroImage* **59**, 467–477 (2012).
- 529 90. Budde, M. D. & Frank, J. A. Neurite beading is sufficient to decrease the apparent diffusion coefficient after  
530 ischemic stroke. *Proc. Natl. Acad. Sci.* **107**, 14472–14477 (2010).
- 531 91. Wang, Y. *et al.* Quantification of increased cellularity during inflammatory demyelination. *Brain* **134**, 3590–  
532 3601 (2011).

533 92. Falangola, M. F. *et al.* Histological correlation of diffusional kurtosis and white matter modeling metrics in  
534 cuprizone-induced corpus callosum demyelination. *NMR Biomed.* **27**, 948–957 (2014).

535

## 536 **Figure Legends**

### 537 **Table 1**

538 Overview of the effect of various pathological processes on diffusion metrics, adapted from <sup>44</sup>. Astro- and microgliosis  
539 reduce water diffusivity and increase kurtosis via increased cellularity. Demyelination on the contrary translates to  
540 increased diffusivities and reduced kurtosis. When both are concomitant, they have competing effects. ↑: increase, ↓:  
541 decrease, ~: unchanged. Metrics are defined in **Fig.1**.

### 542 **Figure 1**

543 Schematic of White Matter Tract integrity-Watson (WMTI-W) biophysical model. Axons are modeled as a collection  
544 of sticks embedded into an extra-axonal space. Estimated parameters are: axonal water fraction  $f$ , intra-axonal  
545 diffusivity,  $D_a$ , extra-axonal parallel and radial diffusivities,  $D_{e,||}$  and  $D_{e,\perp}$ , and axonal orientation alignment,  $c_2$ . The  
546 latter is derived from the concentration parameter of the Watson distribution,  $\kappa$  and corresponds to  $c_2 \equiv \langle \cos^2 \psi \rangle$ , with  
547  $\psi$  being the angle between axons and the main bundle orientation.  $c_2$  varies between  $\frac{1}{3}$ , isotropic, and 1, perfectly  
548 parallel axons.

### 549 **Table 2**

550 Cohort demographics. HC amount to 135 Individuals, 79 HC were shared between HC-Y and HC-O. P-values refer to  
551 Wilcoxon's tests between clinical and HC groups.  $\chi^2$  test is computed for the scanner and sex contingency table. Y:  
552 young, O: old, CPZ: chlorpromazine, Delay MRI-Clin. Ass.: difference in months between MRI scan and clinical  
553 assessment, SOFAS: Social and Occupational Functioning Assessment Scale, GAF: Global Assessment of Functioning,  
554 PANSS: Positive and Negative Syndrome Scale, MADRS: Montgomery-Asberg Depression Rating Scale.

555

### 556 **Figure 2**

557 Strip plot of the group comparisons. Each clinical group is compared to its respective HC group. \*:  $p \leq 5e-2$ , \*\*:  $p \leq 1e-$   
558  $2$ , \*\*\*:  $p \leq 1e-3$ , \*\*\*\*:  $p \leq 1e-4$ .

559

### 560 **Figure 3**

561 Heatmaps and brainplots of the JHU ROI group comparison. Top: group comparisons (y-axis right) heatmap of the  
562 Brunner-Munzel test significance levels for each dMRI metric (y-axis left) and each region of interest (x-axis). Bottom:  
563 brainplots of the same comparisons. The colorbar is shared. Red: clinical group > HC, Blue: clinical group < HC. NS:  
564  $p > 0.05$ , \*:  $p \leq 5e-2$ , \*\*:  $p \leq 1e-2$ , \*\*\*:  $p \leq 1e-3$ , \*\*\*\*:  $p \leq 1e-4$ .

565 *Abbreviations:* L: left; R: right; MIDCP: Middle cerebellar peduncle; PCT: Pontine crossing tract; GCC/BCC/SCC:  
566 Genu/Body/Splenium of corpus callosum; ; FX: Fornix (column and body); CST: Corticospinal tract; ML: Medial  
567 lemniscus; ICP/SCP: Inferior/Superior cerebellar peduncle; CP: Cerebral peduncle; ALIC/PLIC/RPIC: Anterior  
568 limb/Posterior Limb/ Retrolenticular part of internal capsule; ACR/SCR/PCR: Anterior/Superior/Posterior corona  
569 radiata; PTR: Posterior thalamic radiation; SAGSTR: Sagittal stratum; EC: External capsule; CING/CG: Cingulum  
570 (cingulate gyrus); CING/HIP: Cingulum (hippocampus); FX/STRIA: Fornix (crus) / Stria terminalis ; SLF: Superior  
571 longitudinal fasciculus; SFOF/IFOF: Superior/Inferior fronto-occipital fasciculus; IUF: Uncinate fasciculus; TPTM:  
572 Tapetum.

573 **Figure 4**

574 Hierarchical clustering of the correlation matrices between WM microstructure estimates and psychopathological  
575 symptoms domains. A: EP; B: SZ. Microstructure estimates were corrected for sex and quadratic age. The line  
576 diagrams indicate the clustering results. GAF: Global Assessment of Functioning scale; MADRS: Montgomery-Asberg  
577 Depression Rating Scale; Positive and Negative Syndrome Scales: pos.: positive; neg.: negative, dis.: disorganized;  
578 depr.: depressive; exc.: excited.

579

580

581



582 **Tables**

583 **Table 1**

| Cellular process           | Proposed changes in signal in DTI and DKI metrics | Validation experiments                                                                      | Proposed changes in WMTI metrics                              | Validation experiments                                              |
|----------------------------|---------------------------------------------------|---------------------------------------------------------------------------------------------|---------------------------------------------------------------|---------------------------------------------------------------------|
| Microgliosis               | DTI ↓, DKI ↑                                      | Early stages of the mouse cuprizone intoxication <sup>46</sup>                              | $D_a \downarrow, D_{e,  } \downarrow, D_{e,\perp} \downarrow$ | Early stages of the mouse cuprizone intoxication <sup>46</sup>      |
| Astrogliosis               | DTI ↓, DKI ↑                                      | Mouse traumatic brain injury model <sup>89</sup>                                            | $D_a \downarrow, D_{e,  } \downarrow, D_{e,\perp} \downarrow$ | Early stages of the mouse cuprizone intoxication <sup>46</sup>      |
| Axonal swelling or beading | RD~, MD↓, AD↓↓, RK~, MK↑, AK↑↑                    | Simulation in synthetic and electron microscopy-derived mouse substrates <sup>104,105</sup> | $D_a \downarrow$                                              | Simulation of neurite beading <sup>90</sup>                         |
| Demyelination              | RD↑↑, MD↑, AD~, RK↓↓, MK↓, AK~                    | Cuprizone mouse model <sup>46,47,91,92</sup>                                                | $f \downarrow, D_{e,  } \uparrow, D_{e,\perp} \uparrow$       | Late stages of the mouse cuprizone intoxication <sup>46,47,92</sup> |
| Remyelination              | RD↓↓, MD↓, AD~, RK↑↑, MK↑, AK~                    | Cuprizone mouse model <sup>46,47</sup>                                                      | $f \uparrow, D_{e,  } \downarrow, D_{e,\perp} \downarrow$     | Mouse cuprizone intoxication <sup>47,*</sup>                        |

\*Opposite trends to demyelination were found for the metrics but were non-significant.

584

585 **Table 2**

|                                | HC-Y<br>(N=130) |     | HC-O<br>(N=84) |     | EP<br>(N=93) |       | SZ (N=47) |       | EP-(HC-Y)   | SZ-(HC-O)      | EP-SZ         |
|--------------------------------|-----------------|-----|----------------|-----|--------------|-------|-----------|-------|-------------|----------------|---------------|
|                                | Mean            | SD  | Mean           | SD  | Mean         | SD    | Mean      | SD    | p-value     | p-value        | p-value       |
| Age (years)                    | 26.8            | 6.8 | 31.9           | 8.1 | 24.7         | 5.5   | 38.1      | 9.4   | 3.0e-02*    | 5.6e-05****    | p=3.5e-15**** |
| Age at Psychosis Onset (years) |                 |     |                |     | 23.0         | 5.8   | 23.8      | 9.3   |             |                | ns            |
| Duration of illness (months)   |                 |     |                |     | 16.3         | 15.5  | 160.8     | 77.9  |             |                | p=1.3e-18**** |
| CPZ-equivalent dose (mg/day)   |                 |     |                |     | 341.0        | 274.5 | 319.6     | 287.7 |             |                | ns            |
| Delay MRI-Clin. Ass. (months)  | 2.5             | 5.5 | 3.1            | 6.9 | 2.1          | 3.2   | 6.6       | 21.3  |             |                | p=1.0e-03**   |
| PANSS: total                   |                 |     |                |     | 62.7         | 15.6  | 62.0      | 15.9  |             |                | ns            |
| PANSS: positive                |                 |     |                |     | 7.0          | 2.9   | 8.3       | 3.6   |             |                | p=2.3e-02*    |
| PANSS: negative                |                 |     |                |     | 14.9         | 5.7   | 14.0      | 5.4   |             |                | ns            |
| PANSS: disorganized            |                 |     |                |     | 5.7          | 2.2   | 6.5       | 2.2   |             |                | p=2.8e-02*    |
| PANSS: excited                 |                 |     |                |     | 6.1          | 2.2   | 6.2       | 2.1   |             |                | ns            |
| PANSS: depressed               |                 |     |                |     | 8.2          | 2.8   | 8.1       | 3.3   |             |                | ns            |
| GAF                            | 83.9            | 4.4 | 83.4           | 4.7 | 56.2         | 11.2  | 56.0      | 13.2  | 1.6e-33**** | 4.6e-16****    | ns            |
| MADRS tot.                     |                 |     |                |     | 12.5         | 8.4   | 13.2      | 8.6   |             |                | ns            |
|                                |                 | N   | Pct.%          | N   | Pct.         | N     | Pct.%     | N     | Pct.%       |                |               |
| Scanner                        | Prisma          | 67  | 51.5           | 43  | 51.2         | 59    | 63.4      | 20    | 42.6        | $\chi^2$ :6.3  | p=.096 ns     |
|                                | Trio            | 63  | 48.5           | 41  | 48.8         | 34    | 36.6      | 27    | 57.4        |                |               |
| Sex                            | Female          | 46  | 35.4           | 35  | 41.7         | 26    | 28.0      | 13    | 27.7        | $\chi^2$ :4.67 | p=.19 ns      |
|                                | Male            | 84  | 64.6           | 49  | 58.3         | 67    | 72.0      | 34    | 72.3        |                |               |

586

587 **Figures**

588 **Figure 1**

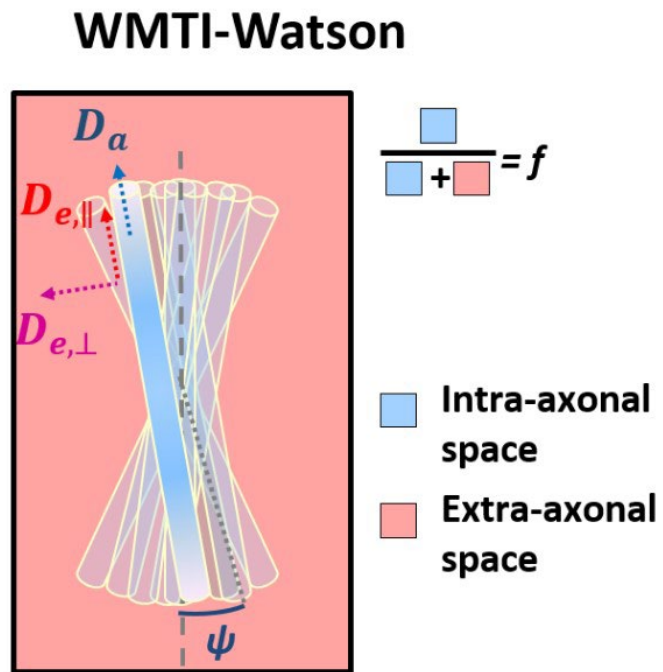

Estimated metrics:

$$f, D_a, D_{e,\parallel}, D_{e,\perp}, \langle \cos^2 \psi \rangle \equiv c_2$$

589

590 **Figure 2**

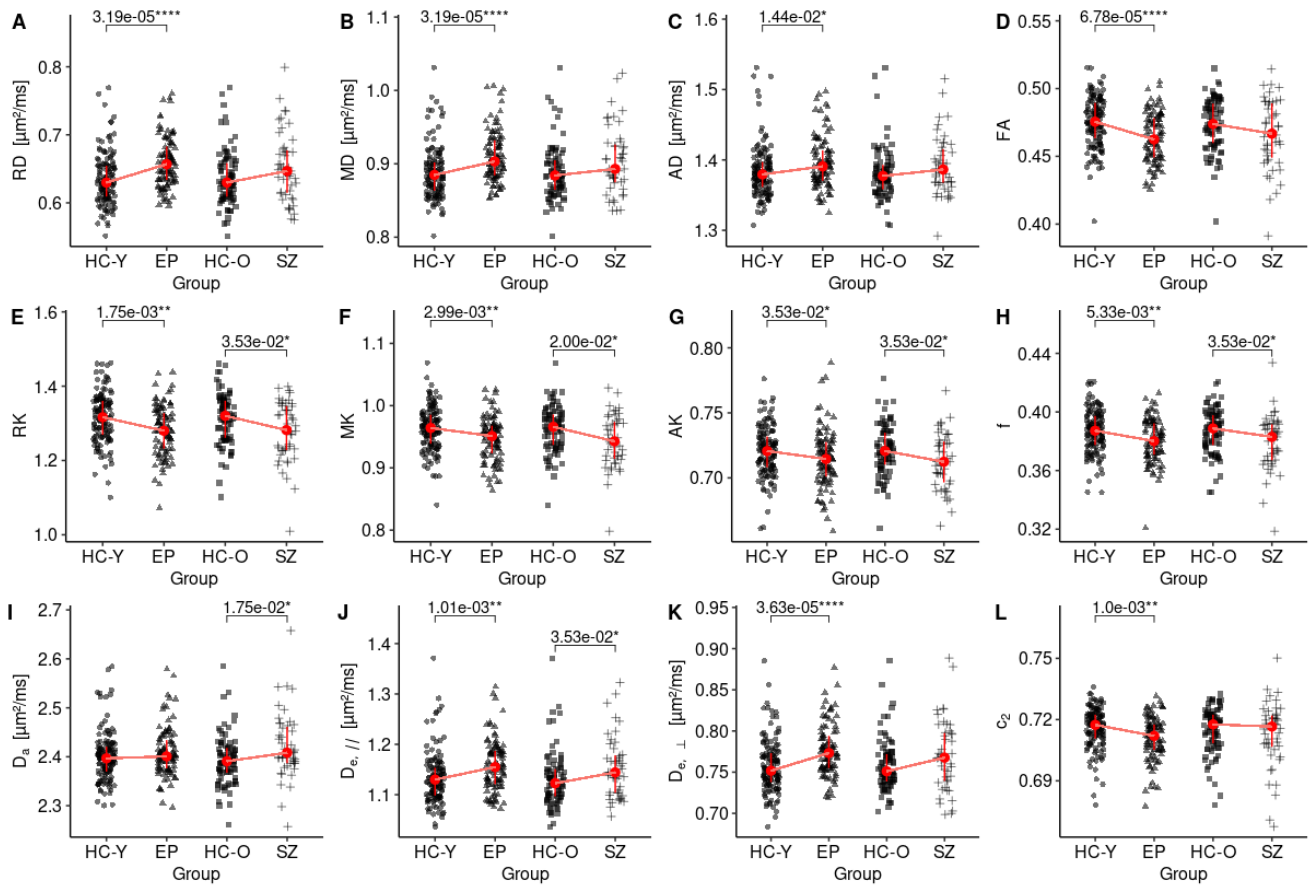

591

592

593 **Figure 3**

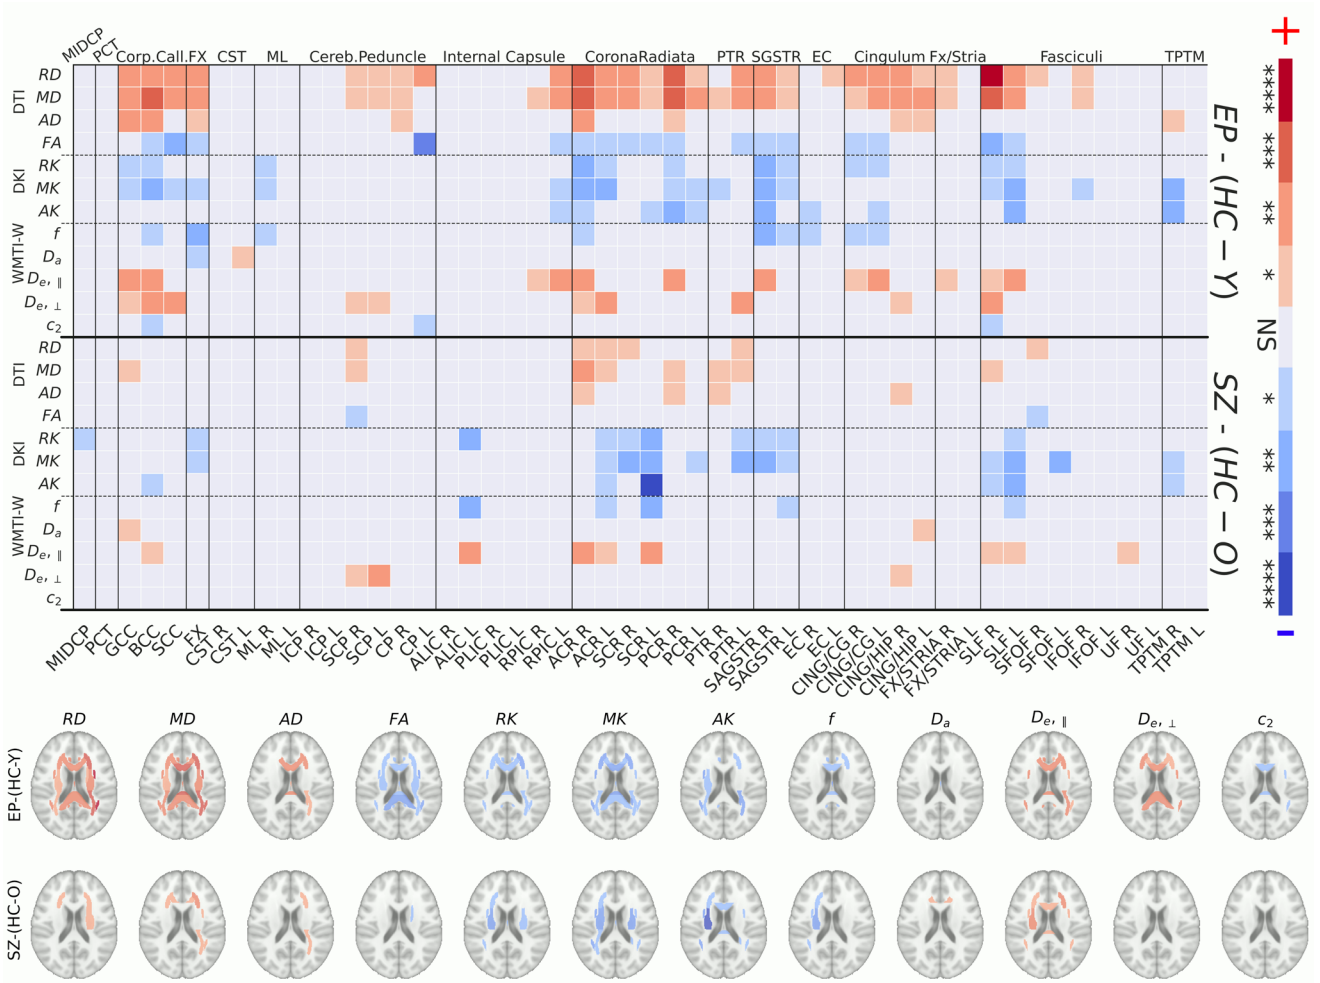

594

595

596 **Figure 4**

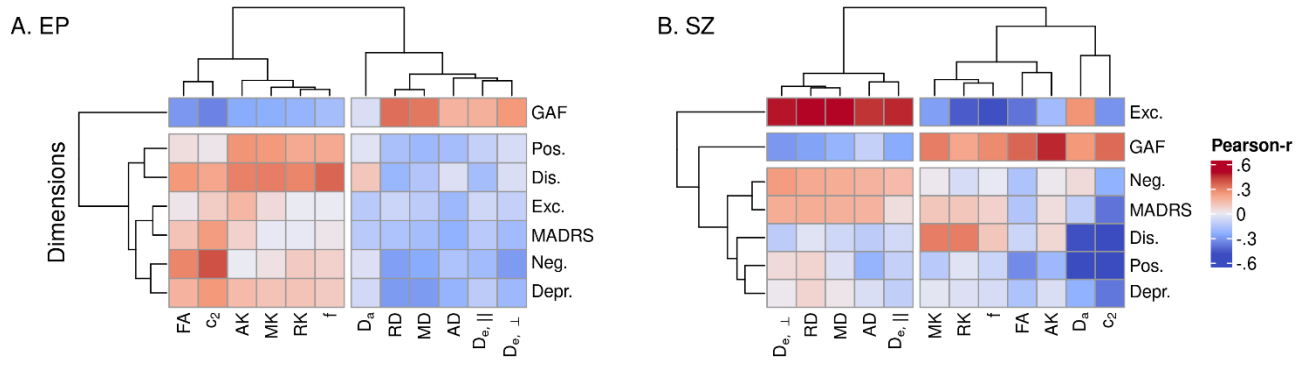

597
