# Supplementary material for: White Matter Microstructure Alterations in Early Psychosis and Schizophrenia
Source: bioRxiv or medRxiv preprint supplement (doi:10.1101/2024.02.01.24301979), 2025-02-10
Supplement: Supplementary file [file media-2.pdf]

| comparison metric | RD                         | MD                         | AD                         | FA                         | RA                         | MA                         | KA                         | D <sub>0</sub>             | D <sub>0.1</sub>           | D <sub>0.5</sub>           | ε <sub>0</sub>             | SZ-(HC-O)                  |
|-------------------|----------------------------|----------------------------|----------------------------|----------------------------|----------------------------|----------------------------|----------------------------|----------------------------|----------------------------|----------------------------|----------------------------|----------------------------|
| MIDCP             | 0.2468, 0.45, [0.34, 0.55] | 0.1871, 0.42, [0.32, 0.53] | 0.1195, 0.41, [0.31, 0.52] | 0.474, 0.51, [0.4, 0.61]   | 0.0378, 0.63, [0.53, 0.73] | 0.0716, 0.61, [0.51, 0.71] | 0.2017, 0.57, [0.46, 0.67] | 0.1882, 0.57, [0.46, 0.68] | 0.2273, 0.46, [0.36, 0.57] | 0.1684, 0.42, [0.32, 0.53] | 0.2818, 0.45, [0.35, 0.56] | 0.2646, 0.45, [0.34, 0.56] |
| PCT               | 0.2342, 0.56, [0.45, 0.66] | 0.1531, 0.57, [0.46, 0.68] | 0.2301, 0.56, [0.45, 0.67] | 0.4203, 0.48, [0.38, 0.59] | 0.0378, 0.63, [0.53, 0.73] | 0.0716, 0.61, [0.51, 0.71] | 0.2017, 0.57, [0.46, 0.67] | 0.1882, 0.57, [0.46, 0.68] | 0.2273, 0.46, [0.36, 0.57] | 0.1684, 0.42, [0.32, 0.53] | 0.2818, 0.45, [0.35, 0.56] | 0.2646, 0.45, [0.34, 0.56] |
| BCC               | 0.0866, 0.41, [0.29, 0.51] | 0.0407, 0.37, [0.27, 0.47] | 0.0716, 0.39, [0.29, 0.49] | 0.2001, 0.56, [0.45, 0.67] | 0.1593, 0.57, [0.46, 0.67] | 0.1004, 0.48, [0.39, 0.58] | 0.0008, 0.48, [0.37, 0.58] | 0.3558, 0.53, [0.43, 0.64] | 0.1133, 0.34, [0.24, 0.44] | 0.1228, 0.41, [0.31, 0.52] | 0.104, 0.4, [0.3, 0.51]    | 0.2901, 0.52, [0.41, 0.63] |
| CCC               | 0.1745, 0.39, [0.28, 0.49] | 0.0745, 0.39, [0.28, 0.49] | 0.1302, 0.42, [0.3, 0.51]  | 0.1901, 0.57, [0.46, 0.68] | 0.1593, 0.57, [0.46, 0.67] | 0.1004, 0.48, [0.39, 0.58] | 0.0008, 0.48, [0.37, 0.58] | 0.3558, 0.53, [0.43, 0.64] | 0.1133, 0.34, [0.24, 0.44] | 0.1228, 0.41, [0.31, 0.52] | 0.104, 0.4, [0.3, 0.51]    | 0.2901, 0.52, [0.41, 0.63] |
| SCC               | 0.2147, 0.44, [0.33, 0.54] | 0.149, 0.42, [0.31, 0.52]  | 0.139, 0.42, [0.31, 0.52]  | 0.1596, 0.58, [0.47, 0.69] | 0.1593, 0.57, [0.46, 0.67] | 0.1004, 0.48, [0.39, 0.58] | 0.0008, 0.48, [0.37, 0.58] | 0.3558, 0.53, [0.43, 0.64] | 0.1133, 0.34, [0.24, 0.44] | 0.1228, 0.41, [0.31, 0.52] | 0.104, 0.4, [0.3, 0.51]    | 0.2901, 0.52, [0.41, 0.63] |
| FX                | 0.1061, 0.4, [0.29, 0.51]  | 0.0941, 0.4, [0.29, 0.51]  | 0.102, 0.42, [0.3, 0.51]   | 0.1596, 0.58, [0.47, 0.69] | 0.1593, 0.57, [0.46, 0.67] | 0.1004, 0.48, [0.39, 0.58] | 0.0008, 0.48, [0.37, 0.58] | 0.3558, 0.53, [0.43, 0.64] | 0.1133, 0.34, [0.24, 0.44] | 0.1228, 0.41, [0.31, 0.52] | 0.104, 0.4, [0.3, 0.51]    | 0.2901, 0.52, [0.41, 0.63] |
| CST R             | 0.3695, 0.49, [0.39, 0.61] | 0.451, 0.49, [0.38, 0.59]  | 0.3735, 0.46, [0.37, 0.58] | 0.3879, 0.47, [0.39, 0.61] | 0.0489, 0.63, [0.52, 0.73] | 0.0397, 0.64, [0.53, 0.73] | 0.1286, 0.59, [0.48, 0.69] | 0.0628, 0.62, [0.51, 0.72] | 0.1183, 0.59, [0.48, 0.69] | 0.1315, 0.59, [0.48, 0.69] | 0.3543, 0.53, [0.42, 0.65] | 0.2901, 0.52, [0.41, 0.63] |
| CST L             | 0.3695, 0.49, [0.39, 0.61] | 0.451, 0.49, [0.38, 0.59]  | 0.3735, 0.46, [0.37, 0.58] | 0.3879, 0.47, [0.39, 0.61] | 0.0489, 0.63, [0.52, 0.73] | 0.0397, 0.64, [0.53, 0.73] | 0.1286, 0.59, [0.48, 0.69] | 0.0628, 0.62, [0.51, 0.72] | 0.1183, 0.59, [0.48, 0.69] | 0.1315, 0.59, [0.48, 0.69] | 0.3543, 0.53, [0.42, 0.65] | 0.2901, 0.52, [0.41, 0.63] |
| ML R              | 0.1758, 0.38, [0.28, 0.49] | 0.0756, 0.45, [0.35, 0.56] | 0.0756, 0.45, [0.35, 0.56] | 0.2296, 0.46, [0.36, 0.57] | 0.1593, 0.57, [0.46, 0.67] | 0.1004, 0.48, [0.39, 0.58] | 0.0008, 0.48, [0.37, 0.58] | 0.3558, 0.53, [0.43, 0.64] | 0.1133, 0.34, [0.24, 0.44] | 0.1228, 0.41, [0.31, 0.52] | 0.104, 0.4, [0.3, 0.51]    | 0.2901, 0.52, [0.41, 0.63] |
| ML L              | 0.1758, 0.38, [0.28, 0.49] | 0.0756, 0.45, [0.35, 0.56] | 0.0756, 0.45, [0.35, 0.56] | 0.2296, 0.46, [0.36, 0.57] | 0.1593, 0.57, [0.46, 0.67] | 0.1004, 0.48, [0.39, 0.58] | 0.0008, 0.48, [0.37, 0.58] | 0.3558, 0.53, [0.43, 0.64] | 0.1133, 0.34, [0.24, 0.44] | 0.1228, 0.41, [0.31, 0.52] | 0.104, 0.4, [0.3, 0.51]    | 0.2901, 0.52, [0.41, 0.63] |
| IFOP R            | 0.3044, 0.46, [0.34, 0.57] | 0.2979, 0.47, [0.36, 0.58] | 0.2979, 0.47, [0.36, 0.58] | 0.3454, 0.47, [0.36, 0.57] | 0.1593, 0.57, [0.46, 0.67] | 0.1004, 0.48, [0.39, 0.58] | 0.0008, 0.48, [0.37, 0.58] | 0.3558, 0.53, [0.43, 0.64] | 0.1133, 0.34, [0.24, 0.44] | 0.1228, 0.41, [0.31, 0.52] | 0.104, 0.4, [0.3, 0.51]    | 0.2901, 0.52, [0.41, 0.63] |
| IFOP L            | 0.3044, 0.46, [0.34, 0.57] | 0.2979, 0.47, [0.36, 0.58] | 0.2979, 0.47, [0.36, 0.58] | 0.3454, 0.47, [0.36, 0.57] | 0.1593, 0.57, [0.46, 0.67] | 0.1004, 0.48, [0.39, 0.58] | 0.0008, 0.48, [0.37, 0.58] | 0.3558, 0.53, [0.43, 0.64] | 0.1133, 0.34, [0.24, 0.44] | 0.1228, 0.41, [0.31, 0.52] | 0.104, 0.4, [0.3, 0.51]    | 0.2901, 0.52, [0.41, 0.63] |
| UF R              | 0.2537, 0.45, [0.35, 0.56] | 0.1659, 0.46, [0.36, 0.57] | 0.1659, 0.46, [0.36, 0.57] | 0.2296, 0.46, [0.36, 0.57] | 0.1593, 0.57, [0.46, 0.67] | 0.1004, 0.48, [0.39, 0.58] | 0.0008, 0.48, [0.37, 0.58] | 0.3558, 0.53, [0.43, 0.64] | 0.1133, 0.34, [0.24, 0.44] | 0.1228, 0.41, [0.31, 0.52] | 0.104, 0.4, [0.3, 0.51]    | 0.2901, 0.52, [0.41, 0.63] |
| UF L              | 0.2537, 0.45, [0.35, 0.56] | 0.1659, 0.46, [0.36, 0.57] | 0.1659, 0.46, [0.36, 0.57] | 0.2296, 0.46, [0.36, 0.57] | 0.1593, 0.57, [0.46, 0.67] | 0.1004, 0.48, [0.39, 0.58] | 0.0008, 0.48, [0.37, 0.58] | 0.3558, 0.53, [0.43, 0.64] | 0.1133, 0.34, [0.24, 0.44] | 0.1228, 0.41, [0.31, 0.52] | 0.104, 0.4, [0.3, 0.51]    | 0.2901, 0.52, [0.41, 0.63] |
| TPTM R            | 0.1164, 0.41, [0.31, 0.51] | 0.1082, 0.4, [0.3, 0.51]   | 0.1082, 0.4, [0.3, 0.51]   | 0.2139, 0.56, [0.46, 0.67] | 0.1593, 0.57, [0.46, 0.67] | 0.1004, 0.48, [0.39, 0.58] | 0.0008, 0.48, [0.37, 0.58] | 0.3558, 0.53, [0.43, 0.64] | 0.1133, 0.34, [0.24, 0.44] | 0.1228, 0.41, [0.31, 0.52] | 0.104, 0.4, [0.3, 0.51]    | 0.2901, 0.52, [0.41, 0.63] |
| TPTM L            | 0.1164, 0.41, [0.31, 0.51] | 0.1082, 0.4, [0.3, 0.51]   | 0.1082, 0.4, [0.3, 0.51]   | 0.2139, 0.56, [0.46, 0.67] | 0.1593, 0.57, [0.46, 0.67] | 0.1004, 0.48, [0.39, 0.58] | 0.0008, 0.48, [0.37, 0.58] | 0.3558, 0.53, [0.43, 0.64] | 0.1133, 0.34, [0.24, 0.44] | 0.1228, 0.41, [0.31, 0.52] | 0.104, 0.4, [0.3, 0.51]    | 0.2901, 0.52, [0.41, 0.63] |

Table S 6: Chronic schizophrenia: region of interest heatmap group comparisons. Respectively: FDR p-val, Effect size, [low-CI, high-CI]. HC: healthy controls, Y: young, O: old, EP: early psychosis, SZ: chronic schizophrenic.
